# Supplementary material for: Evaluation of Newly Synthesized Chalcone Derivatives Effect on PC12 Cells in in Vitro Model of The Parkinson's Disease As a Potential Treatment
Source: Research Square preprint supplement (doi:10.21203/rs.3.rs-354679/v1), 2021-04-01
Supplement: Supplementary file 3 [file 328fcd5b9b3652296264ff4f.docx]

**Table. S.1**. Percentage contribution of Kamlet–Abboud–Taft and Catalán solvatochromic parameters for absorbance of Chalcone compounds (Ref.44)

| Kamlet–Abboud–Taft | | | |
| --- | --- | --- | --- |
|  |  |  |  |
| Chalcone (I) | 10 | 31 | 59 |
|  |  |  |  |
| Chalcone (II) | 17 | 32 | 51 |
|  |  |  |  |
| Chalcone (III) | 17 | 67 | 16 |
|  |  |  |  |
| Catalán | | | |
|  |  |  |  |
|  |  |  |  |
| Chalcone (I) | 17 | 32 | 51 |
|  |  |  |  |
| Chalcone (II) | 15 | 36 | 49 |
|  |  |  |  |
| Chalcone (III) | 20 | 45 | 35 |

(a)

(b)

**Figure. S.1**. Percentage contribution of (a) Kamlet–Abboud–Taft and (b) Catalán solvatochromic parameters for Chalcone drugs (Ref.43)
