# Supplementary figures and images for: Evaluation of Newly Synthesized Chalcone Derivatives Effect on PC12 Cells in in Vitro Model of The Parkinson's Disease As a Potential Treatment
Source: Research Square preprint supplement (doi:10.21203/rs.3.rs-354679/v1), 2021-04-01

Graphical Abstract


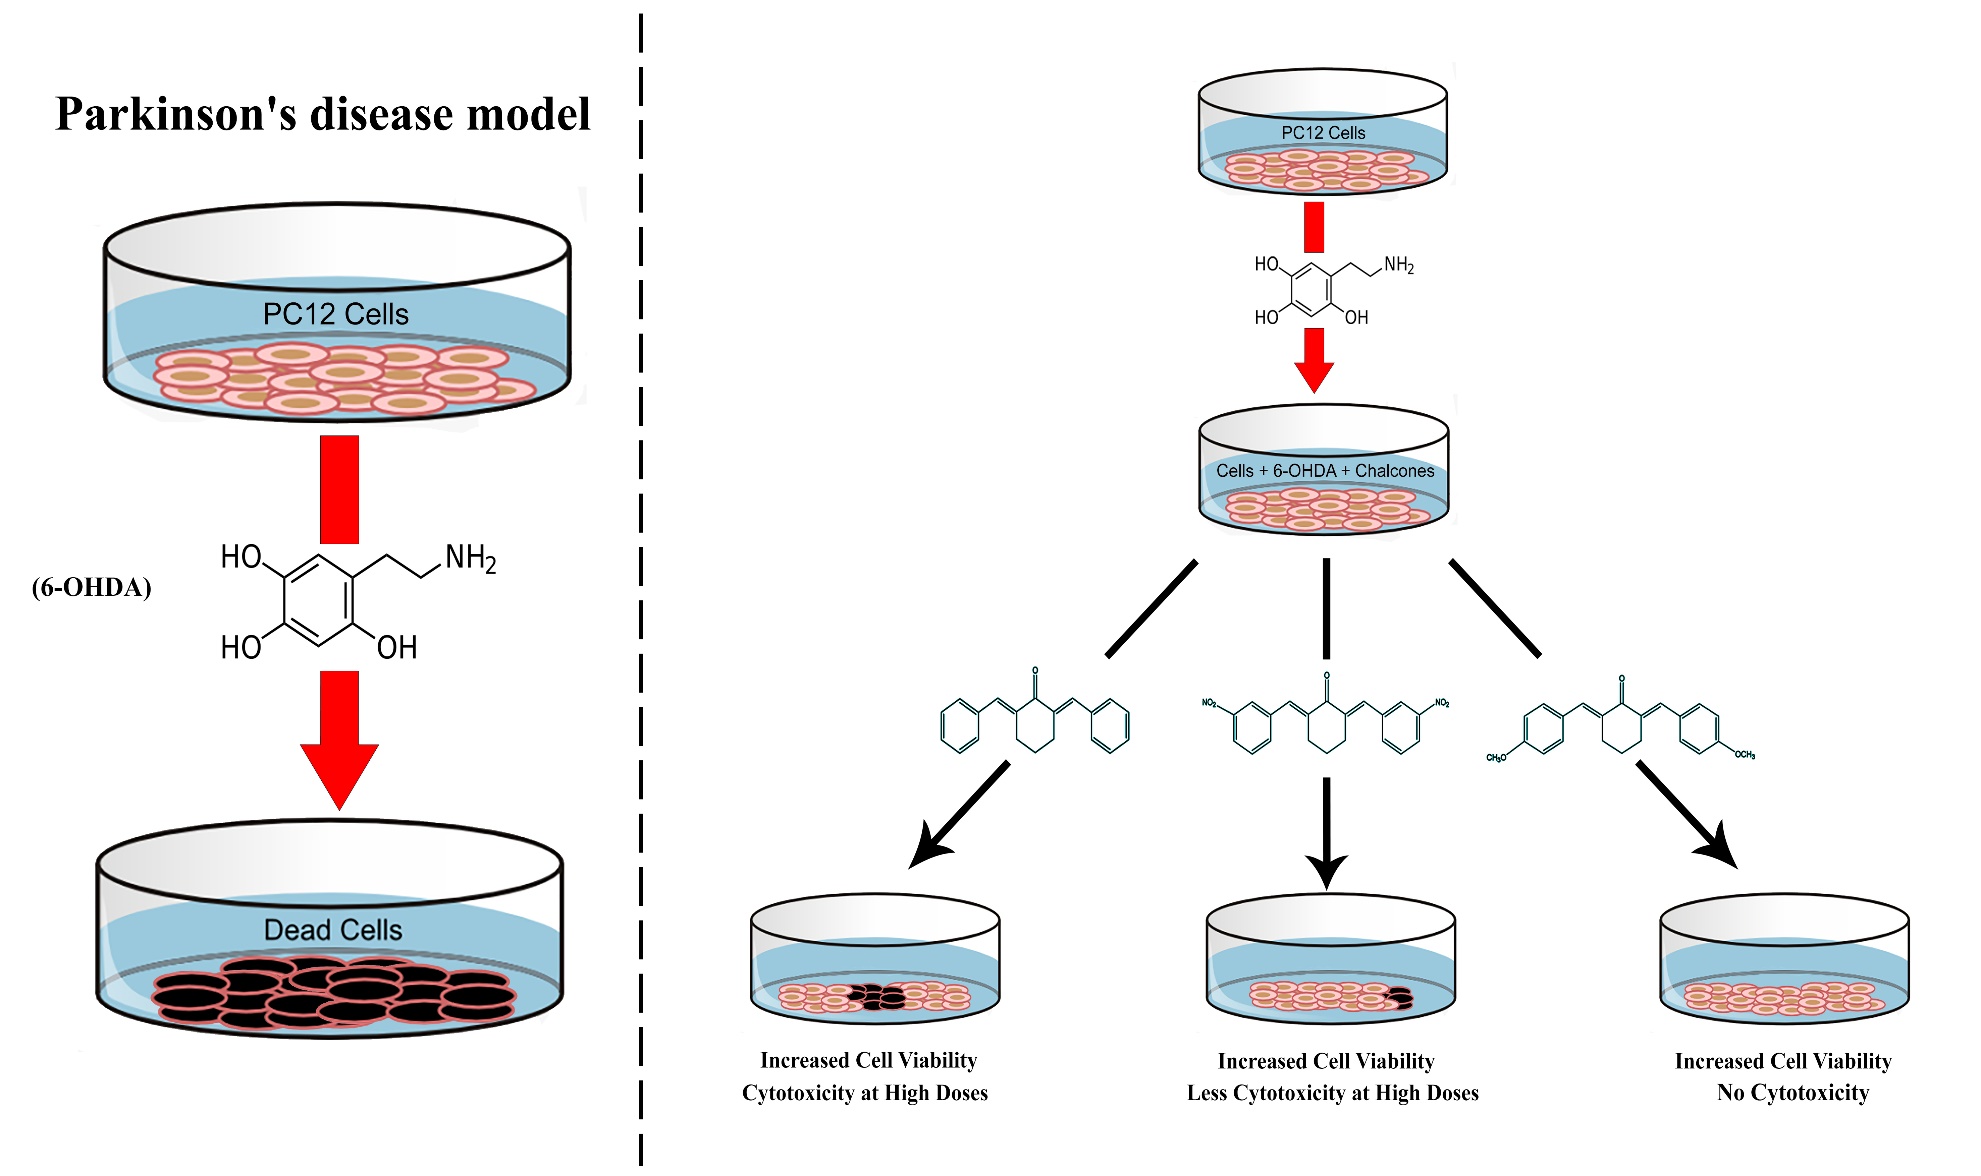

Supplement: Supplementary file 2 [file 5e6174c98172daa8dc513a68.docx]
